# Supplementary material for: miR-429 Inhibits Differentiation and Promotes Proliferation in Porcine Preadipocytes
Source: PubMed Central journal article supplement (PMC5187847; doi:10.3390/ijms17122047), 2016-12-07
Supplement: ijms-17-02047-s001.pdf [file ijms-17-02047-s001.pdf]

## Supplementary Material: miR-429 Inhibits Differentiation and Promotes Proliferation in Porcine Preadipocytes

Ying Peng, Fen-Fen Chen, Jing Ge, Jia-Yu Zhu, Xin-E Shi, Xiao Li, Tai-Yong Yu, Gui-Yan Chu and Gong-She Yang

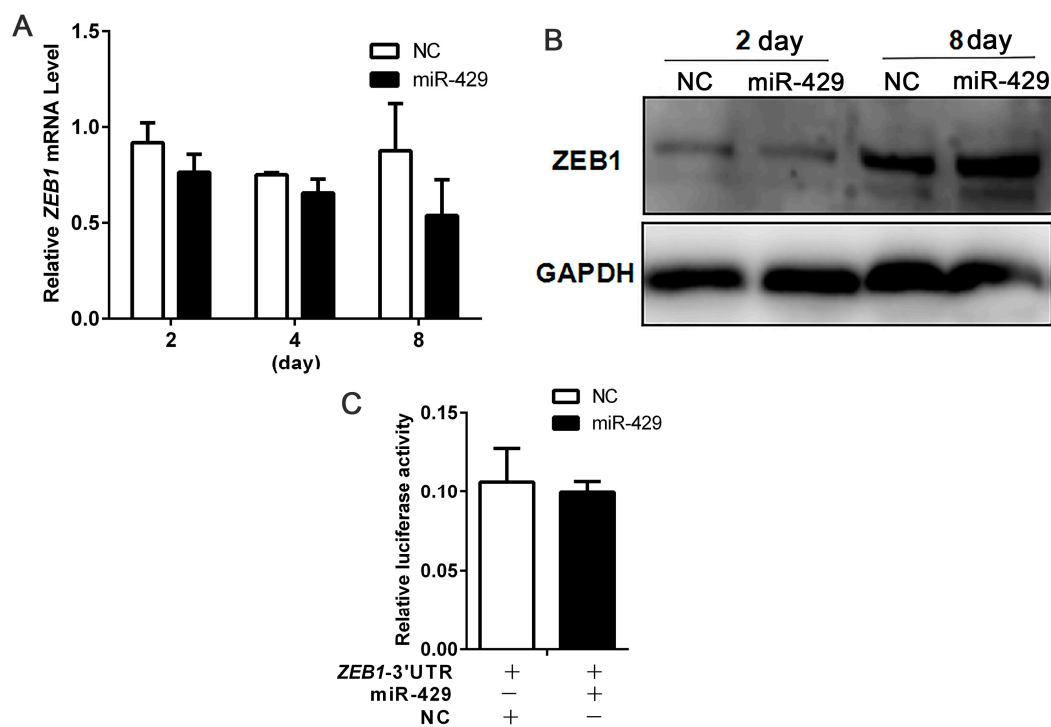

**Figure S1.** MiR-429 cannot target *ZEB1* and change the expression of *ZEB1* in porcine preadipocytes. (A) The mRNA and (B) relative protein level of *ZEB1* in porcine subcutaneous preadipocytes were detected after transfection with miR-429 agomir/negative control (NC); (C) *ZEB1* mRNA 3'UTR dual-luciferase reporter vectors were co-transfected with miR-429 agomir/NC into porcine subcutaneous preadipocytes. Dual-luciferase assay was performed at 48 h after transfection. Results are indicated as means  $\pm$  S.D;  $n = 3$ .
